# Supplementary material for: The chemical redox modulated switch-on fluorescence of carbon dots for probing alkaline phosphatase and its application in an immunoassay
Source: Royal Society of Chemistry journal article supplement (doi:10.1039/c7ra11784a), 2017-12-20
Supplement: c7ra11784a1.pdf [file c7ra11784a1.pdf]

Electronic supplementary information for

**Chemical redox modulated switch-on fluorescence of carbon dots for  
probing alkaline phosphatase and its application in immunoassay**

Pei Song, Qian Liu, Ying Zhang, Wei Liu, Meng Meng, Yongmei Yin\*, Rimo Xi\*

State Key Laboratory of Medicinal Chemical Biology, College of Pharmacy and Tianjin Key

Laboratory of Molecular Drug Research, Nankai University, Tianjin 300353, China

**\*Corresponding Author:**

Tel: +86-(22)-23506290; Fax: +86-(22)-23507760;

**Yongmei Yin:** E-mail: [yinyongmei@nankai.edu.cn](mailto:yinyongmei@nankai.edu.cn)

**Rimo Xi:** E-mail: [xirimo@nankai.edu.cn](mailto:xirimo@nankai.edu.cn)

**Contents:**

1. **Fig. S1** Survey (A), high-resolution C1s (B), N1s (C), and O1s (D) XPS spectra of CDs.
2. **Fig. S2** FT-IR spectrum of the as-prepared CDs.
3. **Fig. S3** Fluorescent emission spectra of the CDs at different excitation wavelengths ranging from 290 nm to 380 nm with increments of 10 nm.
4. **Fig. S4** Fluorescence response of CDs in the presence of different metal ions (A) and small compounds (B). (The concentration of metal ions and compounds were 100  $\mu$ M)
5. **Table S1** Fluorescence lifetimes obtained with three-exponential fit of the fluorescence decay curves of the CDs alone, CDs/Fe(III), and CDs/Fe(III)/AA, respectively.
6. **Fig. S5** (A) Fluorescence spectra of CDs in the presence of 300  $\mu$ M Fe(III) and different concentration of AA from 0 to 600  $\mu$ M. (B) Relationship between fluorescence intensity and the concentration of AA.
7. **Fig. S6** (A) The changes of fluorescence spectra of CDs in the presence of different composition: (a) mere CDs ; (b) CDs + Fe(III); (c) CDs + Fe(III) + AAP; (d) CDs + Fe(III) + AAP + ALP. (B) The change of fluorescence spectra of CDs in the presence of Fe(III) and ALP.
8. **Fig. S7** Optimization of the experimental conditions for sensing ALP.
9. **Table S2** Comparison of other CDs-based sensors for the determination of ALP.
10. **Table S3** Determination of ALP in human serum samples.
11. **Fig. S8** Selectivity of the fluorescence immunoassay to human IgG (500 ng/mL) compared with other interfering proteins at the concentration of 500 ng/mL.

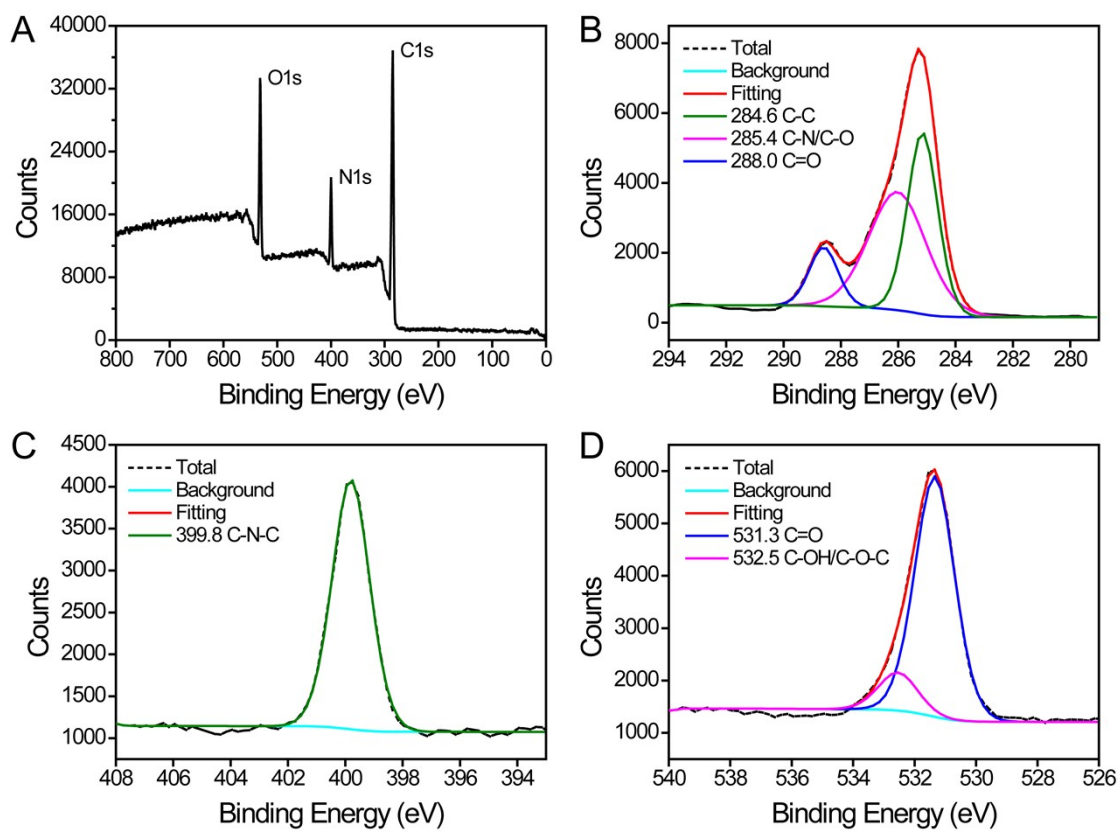

**Fig. S1** Survey (A), high-resolution C 1s (B), N 1s (C), and O 1s (D) XPS spectra of CDs.

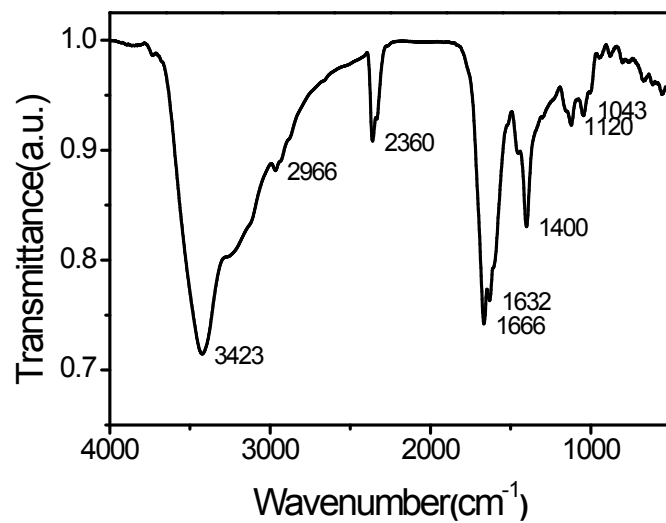

**Fig. S2** FT-IR spectrum of the as-prepared CDs.

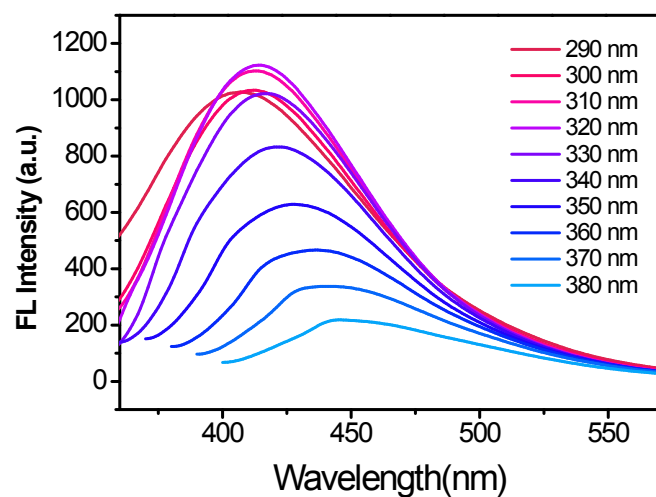

**Fig. S3** Fluorescent emission spectra of the CDs at different excitation wavelengths ranging from 290 nm to 380nm with increments of 10 nm.

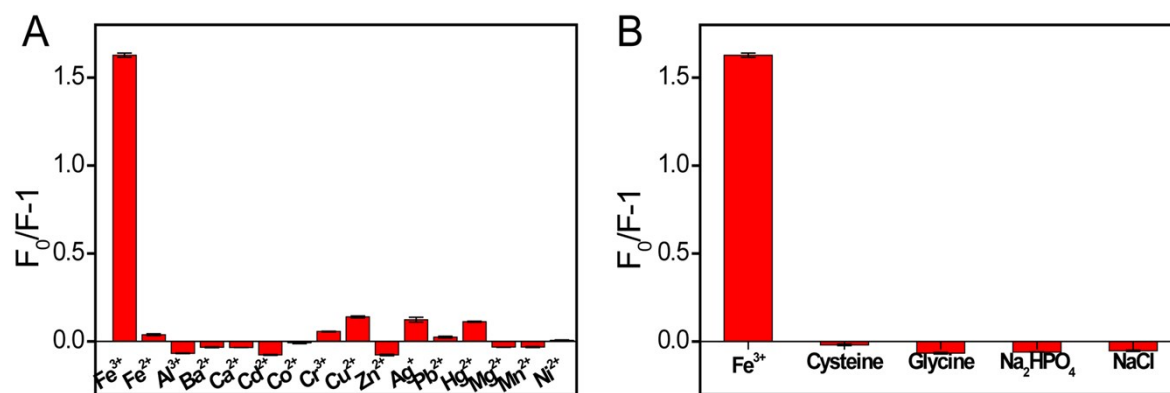

**Fig. S4** Fluorescence response of CDs in the presence of different metal ions (A) and small compounds (B). (The concentration of metal ions and compounds were 100  $\mu$ M)

**Table S1** Fluorescence lifetimes obtained with three-exponential fit of the fluorescence decay curves of the CDs alone, CDs/Fe(III), and CDs/Fe(III)/AA, respectively.

| Samples       | Lifetimes (s) |          |          | B1    | B2    | B3    | $\tau_{avg}(s)$ |
|---------------|---------------|----------|----------|-------|-------|-------|-----------------|
|               | $\tau_1$      | $\tau_2$ | $\tau_3$ |       |       |       |                 |
| CD            | 9.49E-10      | 4.65E-09 | 1.27E-08 | 28.63 | 42.48 | 28.90 | 9.48E-09        |
| CD/Fe(III)    | 1.09E-09      | 4.86E-09 | 1.24E-08 | 21.37 | 42.39 | 36.24 | 9.76E-09        |
| CD/Fe(III)/AA | 1.26E-09      | 5.02E-09 | 1.29E-08 | 26.67 | 43.12 | 30.20 | 9.62E-09        |

Note: The fluorescence lifetimes of the CDs under different conditions were measured. The fluorescence decays could be fit to the three-exponential Equation (1):

$$f(\tau) = A + B_1 e^{-\tau/\tau_1} + B_2 e^{-\tau/\tau_2} + B_3 e^{-\tau/\tau_3}$$

Where  $\tau_1$ ,  $\tau_2$ ,  $\tau_3$  are the three components of the lifetimes, A is the background offset (a fitting parameter), and B1, B2, B3 are pre-exponential functions which are related to the emission intensity. The average lifetime  $\tau_{avg}$  can be calibrated according to Equation (2):

$$\tau_{avg} = \frac{A + B_1 \tau_1 + B_2 \tau_2 + B_3 \tau_3}{A + B_1 + B_2 + B_3}$$

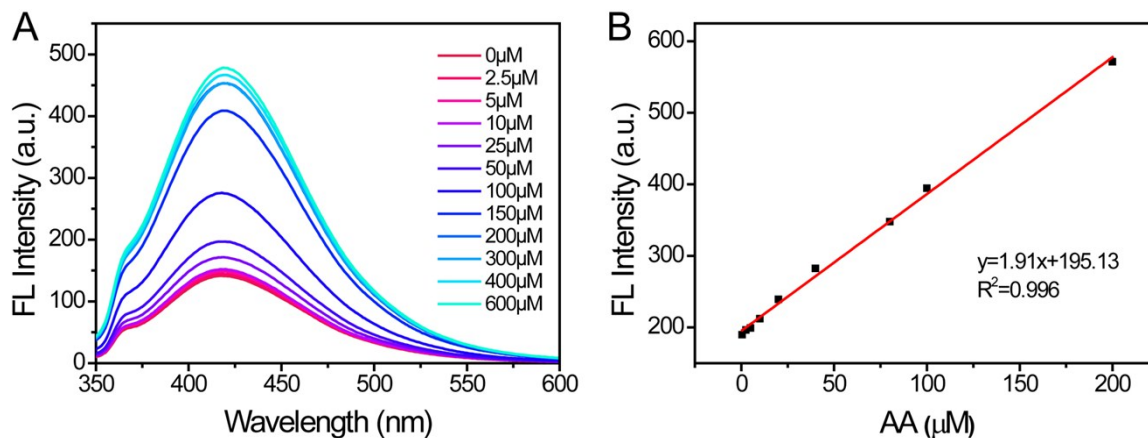

**Fig. S5** (A) Fluorescence spectra of CDs in the presence of 300  $\mu\text{M}$  Fe(III) and different concentration of AA from 0 to 600  $\mu\text{M}$ . (B) Relationship between fluorescence intensity and the concentration of AA.

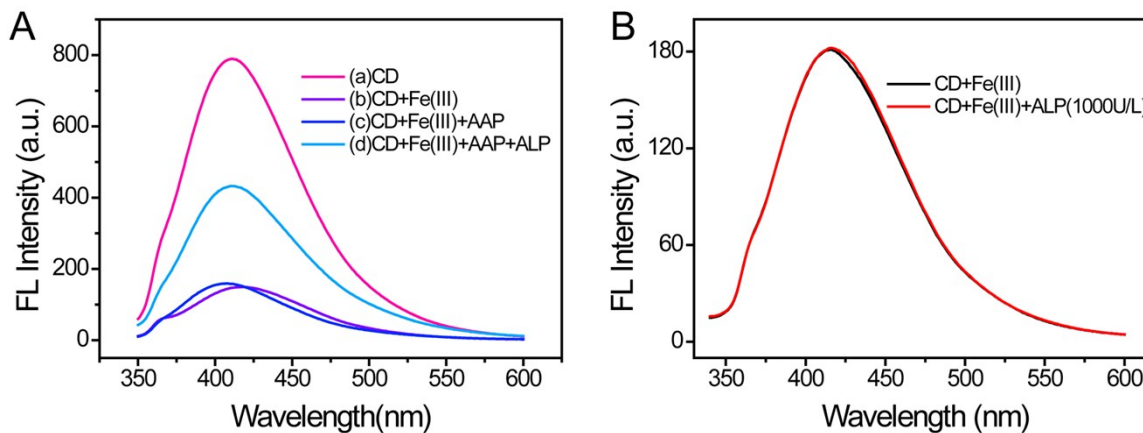

**Fig. S6** (A) The changes of fluorescence spectra of CDs in the presence of different composition: (a) mere CDs ; (b) CDs + Fe(III); (c) CDs + Fe(III) + AAP; (d) CDs + Fe(III) + AAP + ALP. All of the CDs concentrations were 1  $\mu\text{L}/\text{mL}$ ; Fe(III) concentrations were 300  $\mu\text{M}$  in (a), (b) and (c); AAP concentrations were 50 mM in (c) and (d); ALP concentration was 1000 U/L in (d). Excitation: 320 nm and emission: 412 nm. (B) The change of fluorescence spectra of CDs in the presence of Fe(III) and ALP.

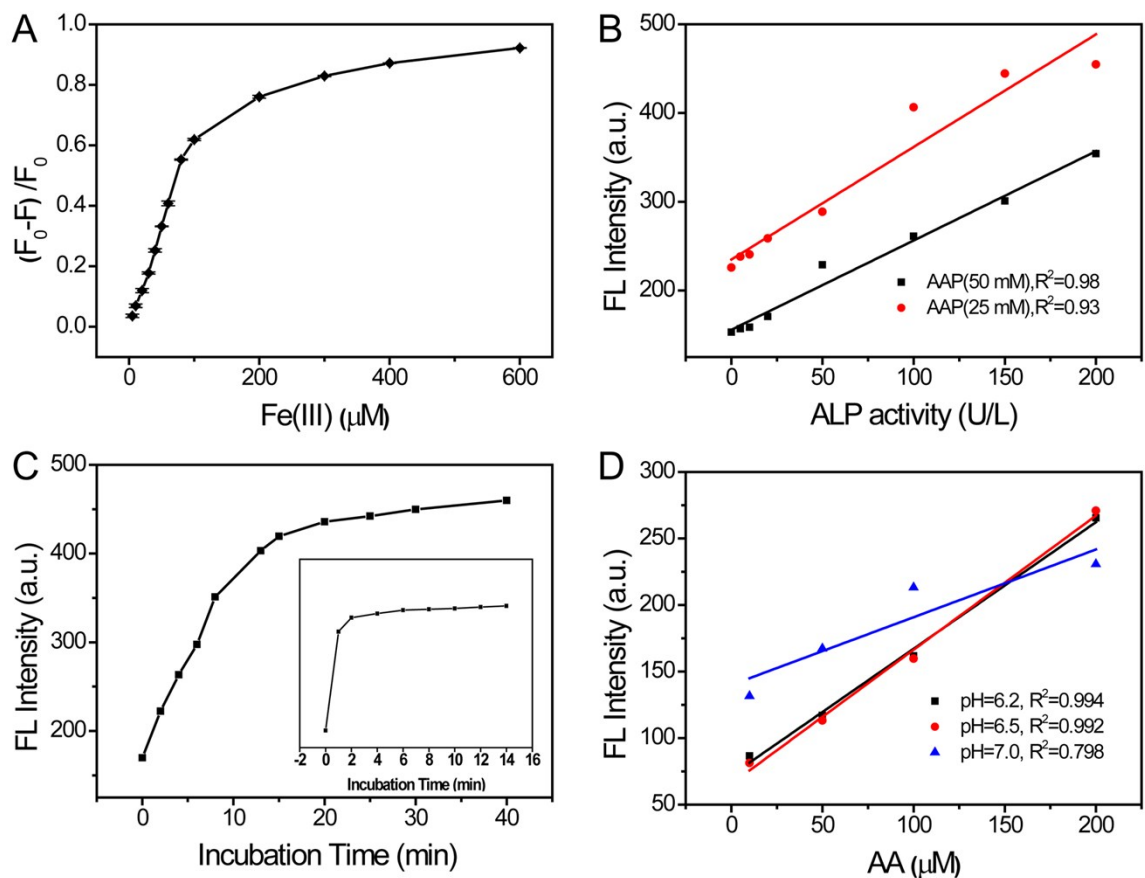

**Fig. S7** Optimization of the experimental conditions for sensing ALP. (A)  $(F_0 - F)/F_0$  versus concentrations of Fe(III) from 0 to 600  $\mu\text{M}$ . (B) The fitting curve between fluorescence intensity of the system and ALP level. Fe(III) of 300  $\mu\text{M}$  and 50 mM AAP (black curve) or 25 mM AAP (red curve) were present. (C) Incubation time of the mixture containing CDs, Fe(III) (300  $\mu\text{M}$ ), AAP (50 mM) and ALP (1000 U/L). Inset: The variation of relative FL intensity of mixture containing CDs, Fe(III) (300  $\mu\text{M}$ ) and AA (200  $\mu\text{M}$ ) at different time interval. (D) The fitting curve between fluorescence intensity of the system and AA level from 5 to 200  $\mu\text{M}$  at different pH (Fe(III): 300  $\mu\text{M}$ ).

**Table S2** Comparison of other CDs-based sensors for the determination of ALP.

| Composition of CDs-based sensors                   | Linear range (U/L) | LOD (U/L) | Reference |
|----------------------------------------------------|--------------------|-----------|-----------|
| $\beta$ -CD-CDs + p-Nitrophenol phosphate disodium | 3.4–100            | 0.9       | (3)       |
| CDs + Cu <sup>2+</sup> + PPI                       | 16.7–782.6         | 1.1       | (4)       |
| CDs + Ce <sup>3+</sup> + ATP                       | 4.6–383.3          | 1.4       | (5)       |
| CDs + Fe <sup>3+</sup> + AAP                       | 5–200              | 0.8       | This work |

**Table S3** Determination of ALP in human serum samples.

| Added (U/L) | Found (U/L) | Recovery (%<br>(n=3)) | RSD (%<br>(n=3)) |
|-------------|-------------|-----------------------|------------------|
| 30          | 28.0        | 93.3                  | 6.3              |
| 60          | 65.6        | 109.3                 | 5.0              |
| 100         | 106.4       | 106.4                 | 6.0              |



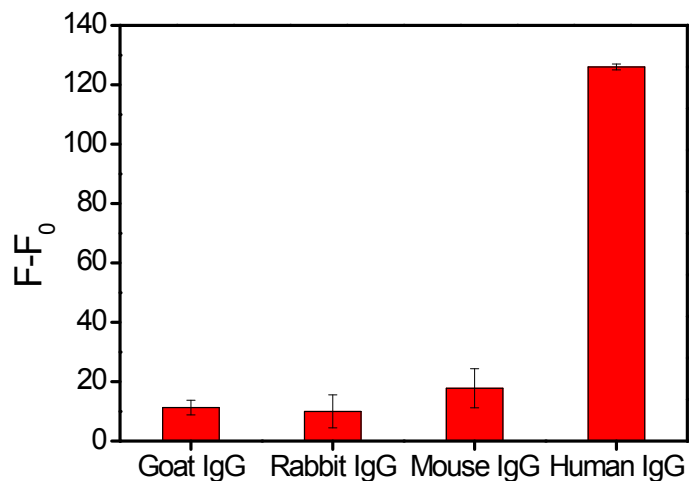

**Fig. S8** Selectivity of the fluorescence immunoassay to human IgG (500 ng/mL) compared with other interfering proteins at the concentration of 500 ng/mL.

### References

- (1) S.H. Cao, N.A. Dong and J.W. Chen, *Phytochem. Analysis*, 2011, **22**, 119-123.
- (2) Q.C. Chen, *J. Agr. Food Chem.*, 2004, **52**, 4604-4613.
- (3) C. Tang, Z. Qian, Y. Huang, J. Xu, H. Ao, M. Zhao, J. Zhou, J. Chen and H. Feng, *Biosens. Bioelectron.*, 2016, **83**, 274-280.
- (4) Z. S. Qian, L. J. Chai, Y. Y. Huang, C. Tang, J. J. Shen, J. R. Chen and H. Feng, *Biosens. Bioelectron.*, 2015, **68**, 675-680.
- (5) Z. Qian, L. Chai, C. Tang, Y. Huang, J. Chen and H. Feng, *Anal. Chem.*, 2015, **87**, 2966-2973.
